# Supplementary material for: A multivariate statistical framework for mixed populations in compound flood analysis
Source: Copernicus journal article supplement (doi:10.5194/egusphere-2024-1122), 2024-05-13
Supplement: Supplementary file 1 [file egusphere-2024-1122-supplement.pdf]

Supplementary

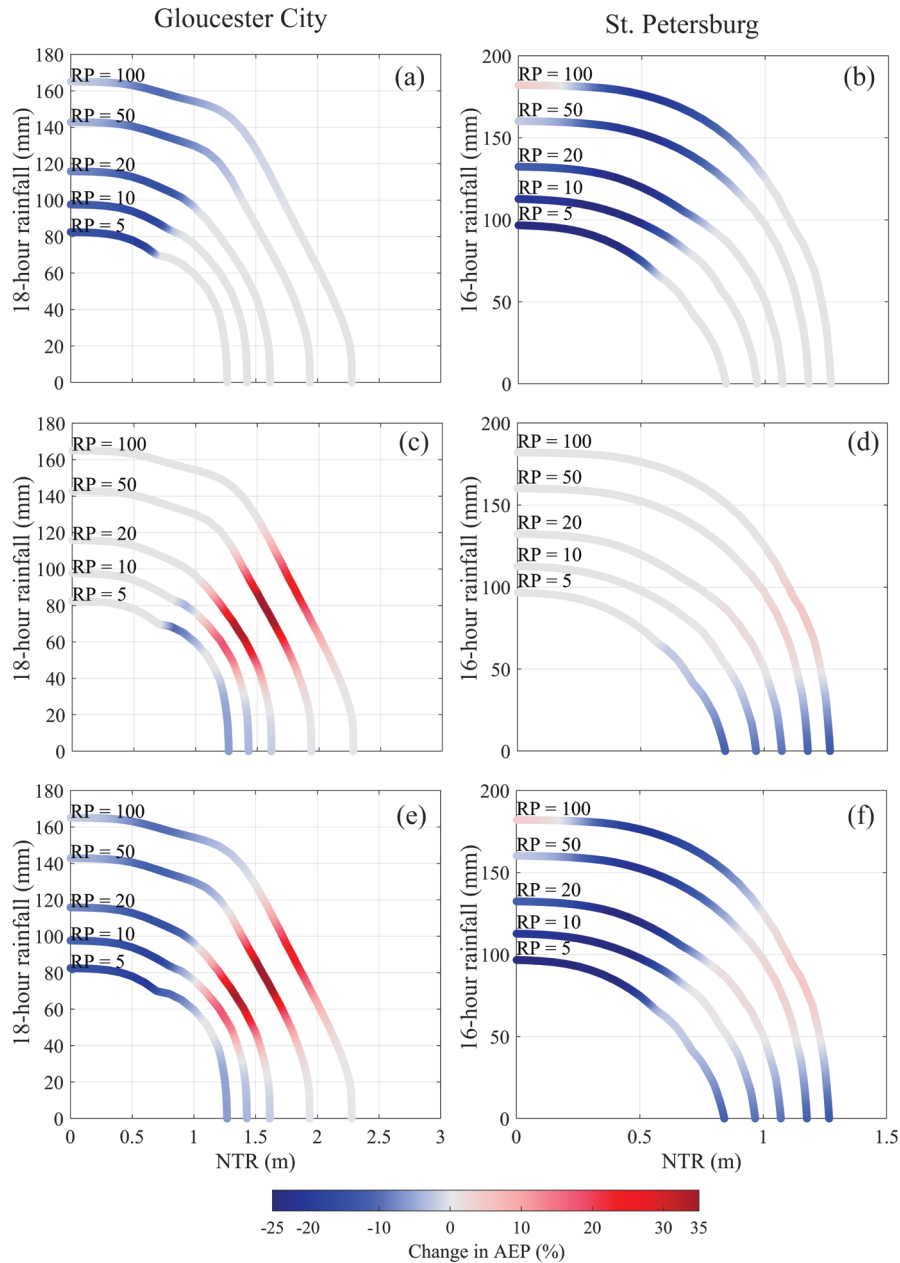

Figure S1: Change in AEP of combined populations in Gloucester City (left) and St. Petersburg (right), allowing the selected copulas to be changed. (a), (b) when omitting the non-classified POT RF events; (c), (d) when omitting the non-classified POT NTR events; and (e), (f) when omitting all non-classified events. The change in AEP was calculated along the joint probability isolines derived for the analysis where events are stratified as TC and non-TC.

**Table S1: Selected Copula families for each conditional sample for the analysis from 1950 to 2021**

|                                        | Gloucester City  |                  |          |          | St. Petersburg |         |          |              |
|----------------------------------------|------------------|------------------|----------|----------|----------------|---------|----------|--------------|
|                                        | TC               |                  | non-TC   |          | TC             |         | non-TC   |              |
|                                        | con. NTR         | con. RF          | con. NRT | con. RF  | con. NTR       | con. RF | con. NRT | Con. RF      |
| Stratifying as TC & non-TC             | Rot. Tawn type 2 | Rot. Tawn type 2 | BB8      | Gaussian | Frank          | Frank   | Sur. BB7 | Sur. Clayton |
| Removing non-classified POT NTR events |                  |                  | Gumbel   | Gaussian |                |         | Gaussian | Sur. Clayton |
| Removing non-classified POT RF events  |                  |                  | BB8      | Clayton  |                |         | Sur. BB7 | Gaussian     |
