# Supplementary material for: A multivariate statistical framework for mixed populations in compound flood analysis
Source: Copernicus journal article supplement (doi:10.5194/egusphere-2024-1122), 2024-05-13
Supplement: Supplementary file [file egusphere-2024-1122-RC3-supplement.pdf]

I would like to compliment the authors for a well-written paper. The research gap this paper aims to fill is clear and relevant. Here are some minor comments to consider

- 1) Consider adjusting the title to speak to a larger audience. Currently, the term 'mixed populations' does not speak for itself. Instead, it would be good to focus on the fact that you look at different storm types that can drive compound flooding
  - a. As a follow-up, the term 'populations' is never clearly defined.
- 2) As RC1 and RC2 have highlighted there are some limitations and uncertainties in the methods that you have used. In the paper, I am missing a proper discussion of these limitations and how to overcome them in the discussion/conclusion
